# Supplementary material for: An S-scheme α-Fe2O3/g-C3N4 heterojunction nanostructure with superior visible-light photocatalytic activity for the aza-Henry reaction
Source: Royal Society of Chemistry journal article supplement (doi:10.1039/d2tc03866h), 2022-01-01
Supplement: d2tc03866h1.pdf [file d2tc03866h1.pdf]

## S-scheme $\alpha$ -Fe<sub>2</sub>O<sub>3</sub>/g-C<sub>3</sub>N<sub>4</sub> heterojunction nanostructure with superior visible-light photocatalytic activity for Aza-Henry reaction

Zhen Li<sup>a,b</sup>, Jiamei Zhang<sup>a</sup>, Rujing Wu<sup>a</sup>, Ping Qiu<sup>a</sup>, Yue Yao<sup>a</sup>, Xiaoyuan Liao<sup>a</sup>, Yan Jiang<sup>a</sup>, Jiawen Shi<sup>c</sup>, Yi Chen<sup>a</sup>, Shuxiang Lu<sup>a,b,\*</sup>

<sup>a</sup> College of Chemical Engineering and Materials Science, Tianjin University of Science and Technology, Tianjin 300457, China

<sup>b</sup> Tianjin Key Laboratory of Brine Chemical Engineering and Resource Eco-utilization, China

<sup>c</sup> School of Artistic Design, Tianjin University of Science and Technology, Tianjin 300222, China

\* Corresponding authors at: College of Chemical Engineering and Materials Science, Tianjin University of Science and Technology, Tianjin 300457, China.

Tel.: +86-22-60601157; fax: +86-22-60600320

Email address: lshx@tust.edu.cn (S. Lu)

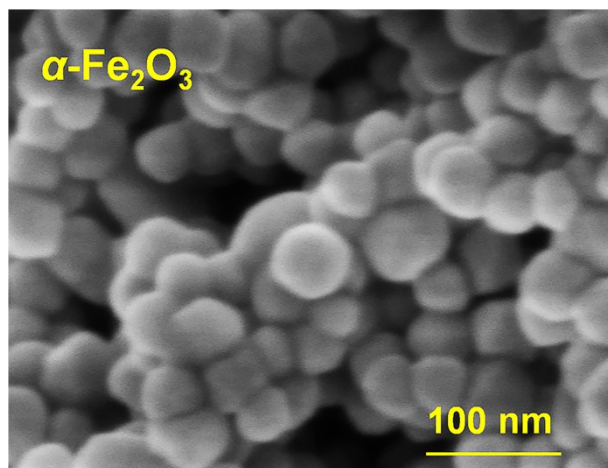

Figure S1. SEM image of  $\alpha\text{-Fe}_2\text{O}_3$ .

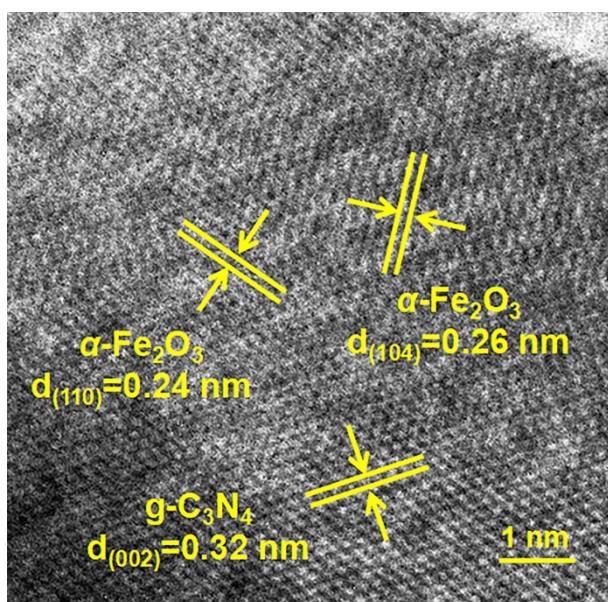

Figure S2. HRTEM image spectra of FOCN composite

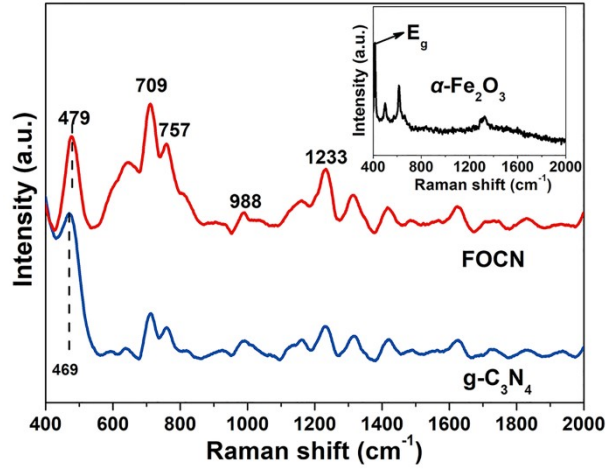

Figure S3. Raman spectra of pure  $g\text{-C}_3\text{N}_4$ , FOCN composites and  $\alpha\text{-Fe}_2\text{O}_3$ .

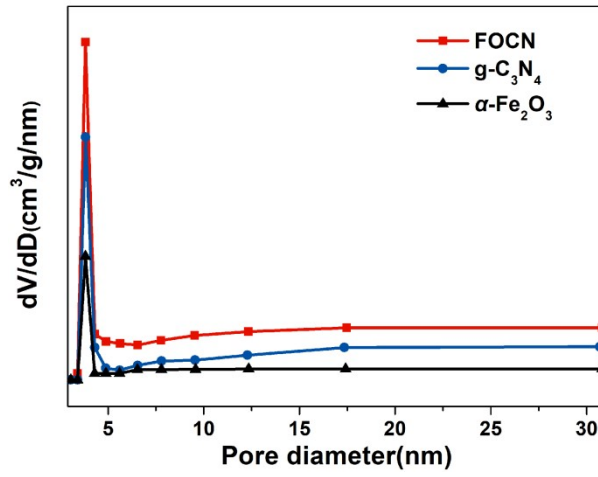

Figure S4. pore size distribution curves of  $g\text{-C}_3\text{N}_4$ ,  $\alpha\text{-Fe}_2\text{O}_3$ , and FOCN composite

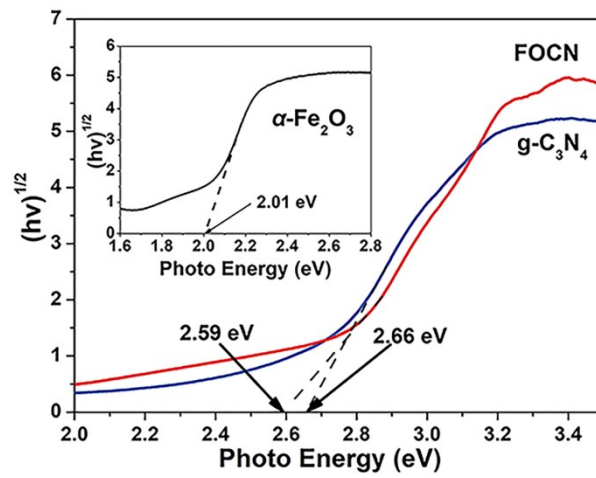

Figure S5. Estimated band gaps of pure  $g\text{-C}_3\text{N}_4$ , FOCN composite and  $\alpha\text{-Fe}_2\text{O}_3$ .

$E_{CB}$  of  $g\text{-C}_3\text{N}_4$  and  $\alpha\text{-Fe}_2\text{O}_3$  could be calculated by the Mulliken electronegativity theory:

$$E_{CB} = X - E_C - 0.5E_g \quad (1)$$

$$X = [X(A)^l X(B)^m X(C)^n]^{1/(l+m+n)} \quad (2)$$

$$E_{VB} = E_{CB} + E_g \quad (3)$$

Here,  $E_{CB}$  is the conduction band edge energy,  $X$  is the electronegativity of the semiconductor,  $E_C$  is the energy of free electrons with the hydrogen scale (4.50 eV),  $E_g$  is the band gap energy of the semiconductor<sup>[1]</sup>. So the values of  $E_{CB}$  and  $E_{VB}$  of  $\alpha\text{-Fe}_2\text{O}_3$  are determined to be 0.34 eV and 2.34 eV, respectively. The CB and VB edge potentials of  $g\text{-C}_3\text{N}_4$  are at -1.14 eV and 1.52 eV, respectively<sup>[2]</sup>. The valence band (VB) and conduction band (CB) edge potentials of  $g\text{-C}_3\text{N}_4$  and  $\alpha\text{-Fe}_2\text{O}_3$  were calculated according to Eqs. (1), (2) and (3).

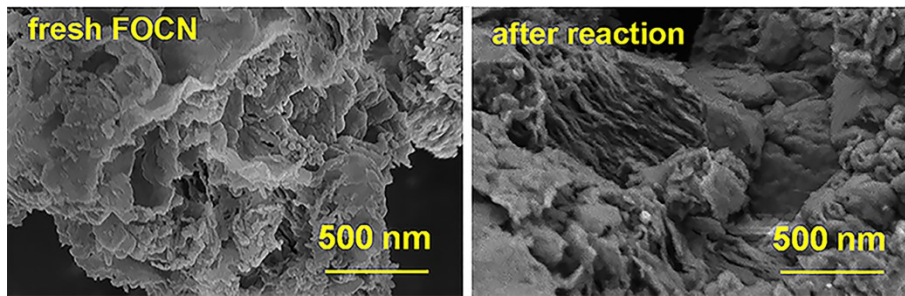

Figure S6. SEM image of FOCN composites before and after the photocatalytic reactions

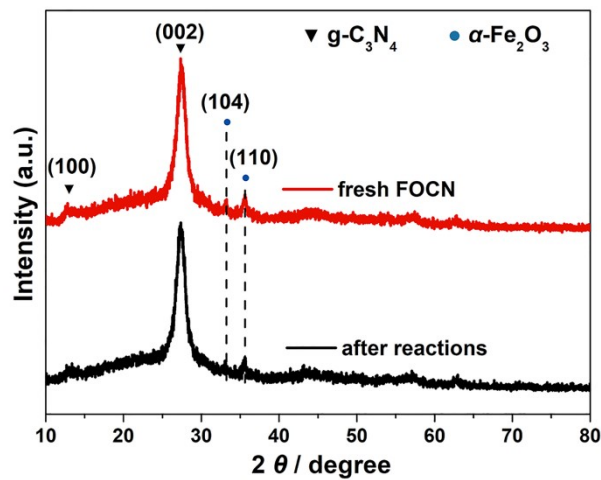

Figure S7. XRD patterns of FOCN composites before and after the photocatalytic reactions

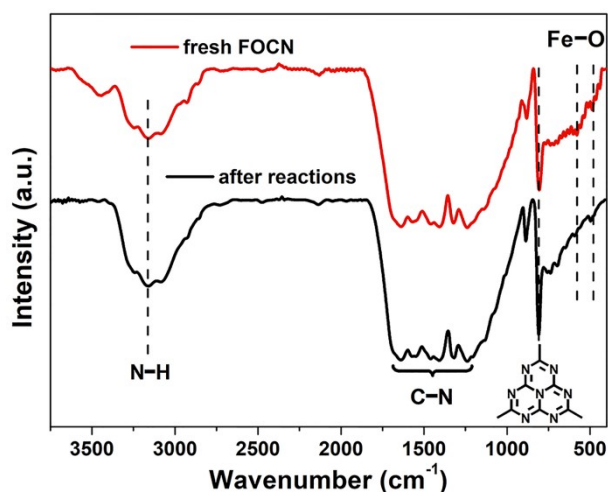

**Figure S8.** FT-IR spectra of FOCN composites before and after the photocatalytic reactions

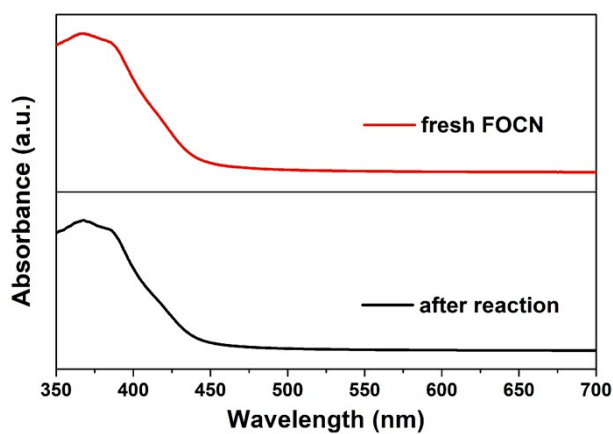

**Figure S9** UV-vis spectra of FOCN composites before and after the photocatalytic reactions

**Table S1. Summary of heterogeneous photocatalyzed Aza-Henry reaction.**

| Photocatalyst                                                             | Synthetic method       | Light source                  | Solvent                         | Time | Yield | Ref. |
|---------------------------------------------------------------------------|------------------------|-------------------------------|---------------------------------|------|-------|------|
| CuO <sub>2</sub> -MoS <sub>2</sub> /graphene                              | precipitate method     | 24 W compact fluorescent bulb | nitromethane                    | 8 h  | 79%   | [1]  |
| Cds                                                                       | precipitate method     | 3 W LED                       | CH <sub>3</sub> CN              | 24 h | 97%   | [2]  |
| UiO-68Se                                                                  | -                      | blue LED                      | CH <sub>3</sub> NO <sub>2</sub> | 4 h  | 90%   | [3]  |
| TiO <sub>2</sub> or ZnO <sub>2</sub>                                      | -                      | 11 W fluorescent bulb         | EtOH                            | 40 h | 93%   | [4]  |
| In <sub>2</sub> S <sub>3</sub> /MoS <sub>2</sub>                          | hydrothermal synthesis | 20 W LED                      | nitromethane                    | 24 h | 74%   | [5]  |
| $\alpha$ -Fe <sub>2</sub> O <sub>3</sub> /g-C <sub>3</sub> N <sub>4</sub> | hydrothermal synthesis | 50 W LED                      | nitromethane                    | 24 h | 62.7% |      |

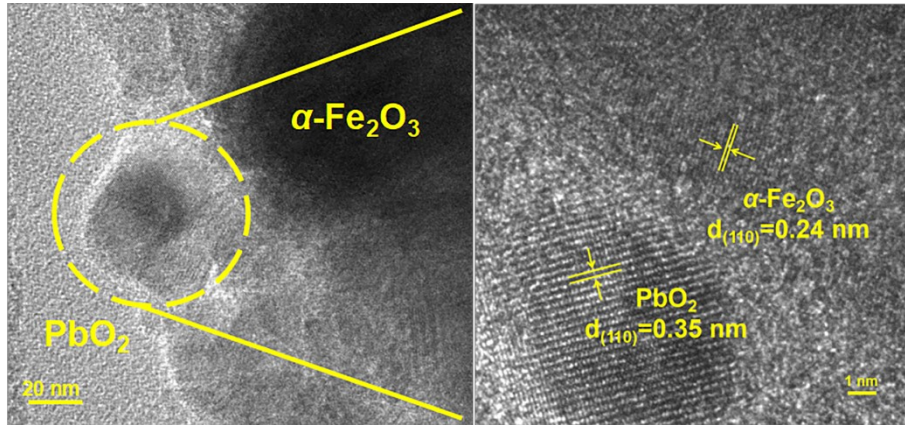

Figure S10 The TEM of photodeposition of composite materials

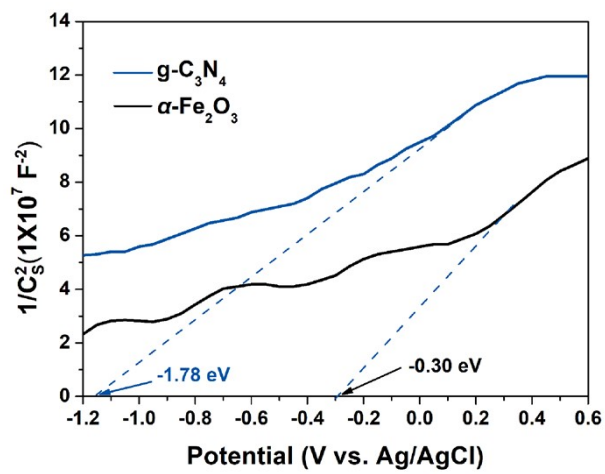

Figure S11 Mott-Schottky curves of  $g\text{-C}_3\text{N}_4$  and  $\alpha\text{-Fe}_2\text{O}_3$

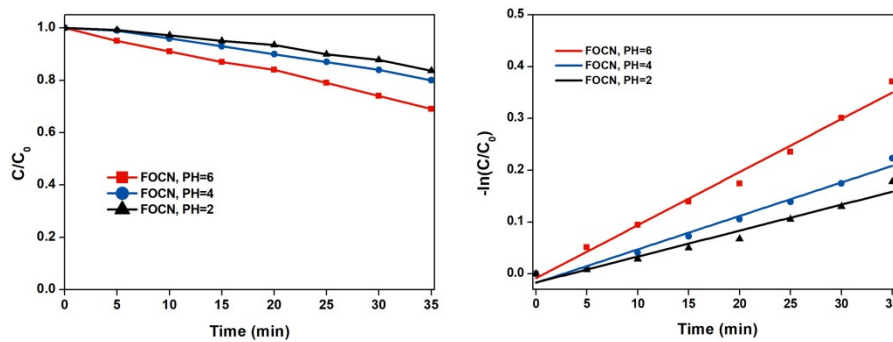

Figure S12 The activity of photocatalytic degradation of tetracycline with different pH

Process of photocatalytic degradation of tetracycline: 10 mg of FOCN was dispersed in 50 mL of tetracycline aqueous solution (50 ppm). After adsorption equilibrium, the mixture was

stirred under the irradiation of a 300W Xe lamp for 35 min, and the concentration of tetracycline analyzed by UV–vis spectrophotometer.

The pH value of the system is around 6, due the intrinsic acidity of tetracycline aqueous solution. As shown in Figure S12, the photocatalytic degradation of tetracycline in FOCN system could be approximately fitted as a first order reaction. Note that, the decrease of pH value might decline the photocatalytic performance of FOCN.

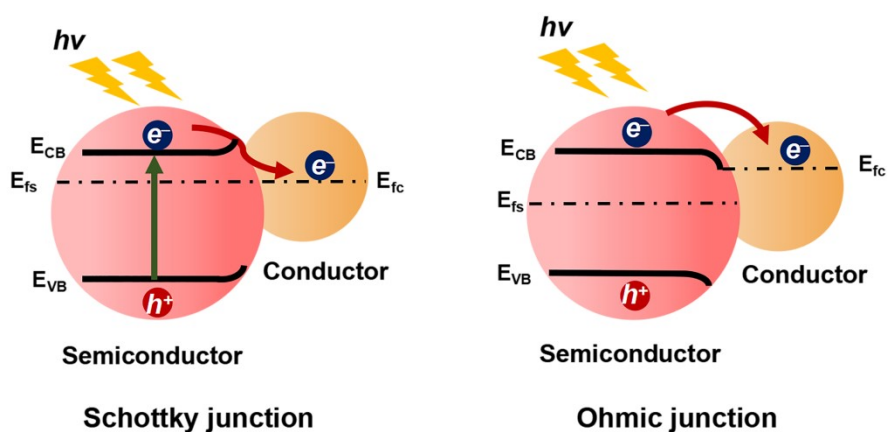

**Figure S13** Design mechanism diagram from the band illustrating for the Schottky junction and the Ohmic contact of *n*-type semiconductor with the conductor.

When a semiconductor is combined with a conductor, they may form Schottky junction or Ohmic junction. Both Schottky junction and Ohmic junction accelerate spatial charge carrier separation and improve photocatalytic performance.



- [1] Z. Li, Y. Pi, D. Xu, Y. Li, W. Peng, G. Zhang, F. Zhang, X. Fan, *Appl. Catal., B*, 2017, **213**, 1-8.
- [2] T. Mitkina, C. Stanglmair, W. Setzer, M. Gruber, H. Kisch, B. König, *Org. Biomol. Chem.*, 2012, **10**, 3556-3561.
- [3] W.Q. Zhang, Q.Y. Li, Q. Zhang, Y.Q. Lu, H. Lu, W.G. Wang, X.S. Zhao, X.J. Wang, *Inorg. Chem.*, 2016, **55**, 1005-1007.
- [4] M. Rueping, J. Zoller, D.C. Fabry, K. Poscharny, R.M. Koenigs, T.E. Weirich, J. Mayer, *Chem.-Eur. J.*, 2012, **18**, 3478-3481.
- [5] Z. Li, Z. Zhou, J. Ma, Y. Li, W. Peng, G. Zhang, F. Zhang, X. Fan, *Appl. Catal., B*, 2018, **237**, 288-294.
- [6] H. Guo, M. Chen, Q. Zhong, Y. Wang, W. Ma, J. Ding, *J. CO<sub>2</sub> Util.*, 2019, **33**, 233-241.
- [7] S. Yan, Y. Shi, Y. Tao, H. Zhang, *Chem. Eng. J.*, 2019, **359**, 933-943.
